# Supplementary material for: Comparative genomics of Hox and ParaHox genes among major lineages of Branchiopoda with emphasis on tadpole shrimps
Source: Frontiers journal article supplement (doi:10.3389/fevo.2023.1046960), 2023-01-24
Supplement: Data_Sheet_1.xlsx [file Data_Sheet_1.xlsx]

## Sheet: Table S1
Supplementary Table S1 - List of genome assemblies used in this work with the relative general statistics. BUSCO scores represent the percentage of both single-copy and duplicated genes.
Species	ID	Order	Family	Assembly level	Total length (bp)	N50 (bp)	BUSCO%	Source	Reference
Artemia franciscana	Afr1	Anostraca	Artemiidae	Scaffold	938,041,450	67,542	66.24%	Korea Polar Research Institute	Jo et al., 2021
Daphnia magna	Dmag	Diplostraca	Daphniidae	Chromosome	122,952,669	10,124,675	98.00%	NCBI (GCF_003990815.1)	Lee et al., 2018
Daphnia pulex	Dpul	Diplostraca	Daphniidae	Scaffold	197,206,209	642,089	98.03%	NCBI (GCA_000187875.1)	Colbourne et al., 2011
Eulimnadia texana	Etex	Diplostraca	Limnadiidae	Scaffold	120,535,642	18,070,303	98.80%	NCBI (GCA_002872375.1)	Baldwin-Brown et al., 2018
Leptestheria dahalacensis	Ldah	Diplostraca	Lepthesteriidae	Scaffold	104,016,550	38,854	95.36%	NCBI (GCA_022114935.1)	Luchetti et al., 2021
Lepidurus apus lubbocki	Lubb	Notostraca	Triopsidae	Scaffold	90,320,486	43,471	97.6%	NCBI (GCA_003723985.1)	Savojardo et al., 2019
Lepidurus apus apus	Lapu	Notostraca	Triopsidae	Scaffold	78,857,107	136,761	97.63%	NCBI (GCA_022832285.1)	Luchetti et al., 2021
Lepidurus arcticus	Lart	Notostraca	Triopsidae	Scaffold	73,105,941	118,958	97.53%	NCBI (GCA_003724045.1)	Savojardo et al., 2019
Lepidurus couesii	Lcou	Notostraca	Triopsidae	Scaffold	76,388,658	40,400	95.95%	NCBI (GCA_022832235.1)	Luchetti et al., 2021
Triops longicaudatus	Tlon	Notostraca	Triopsidae	Scaffold	83,658,226	380,856	97.33%	NCBI (GCA_022885665.1)	Luchetti et al., 2021
Triops cancriformis IT	Tcit	Notostraca	Triopsidae	Scaffold	99,177,902	29,572	96.64%	NCBI (GCA_022832245.1)	Luchetti et al., 2021
Triops cancriformis ES	Tces	Notostraca	Triopsidae	Scaffold	11,5234,264	22,383	95.85%	NCBI (GCA_022832265.1)	Luchetti et al., 2021

## Sheet: Table S2
Supplementary Table S2 - List of reference miRNAs used to retrieve Hox associated miRNAs in branchiopod genome assemblies.			miRNA family
miR family	Species	NCBI accession number	miRNA ID
miR-10	Drosophila melanogaster	NR_048336.1	Dmel_mir10
	Nasonia vitripennis	NR_039020.1	Nvit_mir10
	Apis mellifera	NR_034282.1	Amel_mir10
	Tribolium castaneum	NR_036279.1	Tcas_mir10
	Acyrthosiphon pisum	NR_040120.1	Apis_mir10
	Bombyx mori	NR_107237.1	Bmor_mir10
miR-993	Drosophila melanogaster	NR_048333.1	Dmel_mir993
	Nasonia vitripennis	NR_039048.1	Nvit_mir993
	Apis mellifera	NR_034317.1	Amel_mir993
	Tribolium castaneum	NR_036321.1	Tcas_mir993
	Acyrthosiphon pisum	NR_040127.1	Apis_mir993
	Blattella germanica	MF574932.1	Bger_mir993
miR-iab-4	Drosophila melanogaster	NR_048416.1	Dmel_iab4
	Nasonia vitripennis	NR_039019.1	Nvit_iab4
	Apis mellifera	NR_031531.1	Amel_iab4
	Tribolium castaneum	NR_036313.1	Tcas_iab4
	Acyrthosiphon pisum	NR_040121.1	Apis_iab4
	Blattella germanica	MF574989.1	Bger_iab4
	Bombyx mori	NR_107276.1	Bmor_iab4
miR-iab-8	Drosophila melanogaster	NR_048417.1	Dmel_iab8
	Nasonia vitripennis	NR_039018.1	Nvit_iab8
	Tribolium castaneum	NR_038656.1	Tcas_iab8
	Blattella germanica	MF574988.1	Bger_iab8
	Bombyx mori	NR_107477.1	Bmor_iab8
miR-196 (outgroup)	Eptesicus fuscus	NR_129197.2	Efus_mir196
	Taeniopygia guttata	NR_105656.1	Tgut_mir196
	Pan paniscus	NR_106574.1	Ppan_mir196
	Ciona intestinalis	NR_034334.1	Cint_mir196
	Gallus gallus	NR_031492	Ggal_mir196a1
	Danio rerio	NR_034183.1	Drer_mir196a1
	Homo sapiens	NR_029582	Hsap_mir196a1

## Sheet: Table S3
Supplementary Table S3 - The complete set of HPHGs and eve orthologs used in this work. For every gene, the geneID as found in the relative genome annotation is reported. For genes that have been retrieved using Exonerate, genome coordinates have been provided. Multiple copies of a given gene in one species are separated by a vertical bar.
Species	lab	pb	Hox3	dfd	scr	ftz	antp	ubx	abdA	abdB	ind	cad	Pdx	eve
Drosophila melanogaster	NP_476613.1	NP_476669.3	NP_731113.2|NP_476794.1|NP_476793.1	NP_477201.1	NP_524248.2	NP_477498.1	NP_996174.1	NP_536752.1	NP_476693.1	NP_650577.1	NP_996087.2	NP_001260641.1	-	NP_523670.2
Folsomia candida	XP_021952045.1	XP_035706958.1	XP_021951314.1	XP_021951082.1	XP_021951280.1	XP_021951322.2	XP_021952588.1	XP_021951054.1	XP_035706584.1	XP_035707030.1	-	XP_035705838.1	-	XP_021951208.1
Artemia franciscana	Art-08854	Art-08853	Art-17274	Art-17275	Art-17271	Art-17267	Art-13755	Art-13756	Art-01483	Art-17013	Art-09810	Art-07949	-	Art-09946
Daphnia magna	XP_032785564.1	XP_032785562.1	XP_032785561.1	XP_032785565.1	XP_032785567.1	XP_032785568.1	XP_032785563.1	XP_032785569.1	XP_032785543.1	XP_032785540.1	-	XP_032786554.1	-	XP_032783829.1
Daphnia pulex	EFX86813.1	EFX86812.1	EFX86809.1	EFX86808.1	EFX86806.1	EFX86805.1	EFX86804.1	EFX86802.1	EFX86800.1	EFX86798.1	-	EFX86750.1	-	EFX79519.1
Eulimnadia texana	C0002.g597.t1|C0007.g32.t1	C0007.g31.t1	C0007.g29.t1	C0002.g599.t1|C0007.g27.t2	C0007.g25.t1	C0007.g24.t1	C0002.g604.t2	-	C0002.g612.t1	-	-	C0008.g151.t2	-	C0001.g1124.t1
Leptesteria dahalacensis	g6310.t1|g14672.t1	g11575.t1	-	g6648.t1	g6649.t1	g1519.t1|g14037.t1	-	g11919.t1	g3248.t1	g1520.t1|g13731.t1	-	g16475.t1	-	g11065.t1|g15473.t1
Lepidurus apus lubbockii	g12364.t1	g8547.t1	g3235.t1	g13200.t1	g3227.t1	g3887.t1	g2738.t1	g3060.t1	g2378.t1	g11468.t1	-	g5810.t1	-	g12894.t1
Lepidurus apus apus	g3174.t1	g3175.t1	g213.t1	g212.t1	g211.t1	g210.t1	g209.t1	g208.t1	g207.t1	g203.t1	-	g7498.t1	-	g5541.t1
Lepidurus arcticus	scaffold280/5813-11999	scaffold280/26205-38736	scaffold16/4934-8704	scaffold16/26766-28509	scaffold16/43072-49883	scaffold16/56265-58302	scaffold16/76632-80500	scaffold16/99292-119002	scaffold16/148340-158623	scaffold16/270668-287580	-	g6847.t1	-	g4721.t1
Lepidurus couesii	scaffold661/5099-11361	scaffold661/25767-27542	scaffold88/78950-82199	scaffold88/58982-60729	scaffold88/37282-44416	scaffold88/28793-30855	scaffold88/5756-9644	g101.t1	scaffold6/75142-85495	scaffold137/20107-37134	-	g3926.t1	-	g1707.t1
Triops longicaudatus	g2620.t1	g2619.t1	g1073.t1	g1071.t1	scaffold16/569761-579661	g1069.t1	g1068.t1	g1067.t1	g1065.t1	g1062.t1	-	scaffold2/196696-202222	-	g7124.t1
Triops cancriformis IT	g7702.t1	g2708.t1	g808.t1	g806.t1	scaffold21/57876-69328	g802.t1	g801.t1	g3772.t1	g509.t1	scaffold3/152746-159561	-	g3522.t1	-	g2755.t1
Triops cancriformis ES	g5763.t1	scaffold2645/10452-11198	g731.t1	g730.t1	g729.t1	g728.t1	g727.t1	g726.t1	g723.t1	scaffold263/12622-19428	-	scaffold1336/3-5810	-	g8243.t1

## Sheet: Table S4
Supplementary Table S4 - List of misannotated genes analysed in this work. For each gene, the relative species is given, as well as the given identity according to previous works and the new identity according to the analysis here presented. For Art-17267, the asterisk denotes that the given identity refers to the first step of blastp annotation here performed, since the gene was not annotated in…
GeneID	Species	Given identity	New identity	Reference annotation (NCBI acc. no.)
Art-17267	Artemia franciscana	antp*	ftz	NA
XP_032795265.1	Daphnia magna	Hox3	?	Lee et al., 2018 (GCF_003990815.1)
XP_032785561.1	Daphnia magna	Uncharacterised	Hox3	Lee et al., 2018 (GCF_003990815.1)
C0007.g29.t1	Eulimnadia texana	pb	Hox3	Baldwin-Brown et al., 2018 (GCA_002872375.1)
C0007.g25.t1	Eulimnadia texana	dfd	scr	Baldwin-Brown et al., 2018 (GCA_002872375.1)
C0007.g24.t1	Eulimnadia texana	dfd/scr	ftz	Baldwin-Brown et al., 2018 (GCA_002872375.1)
C0002.g604.t1	Eulimnadia texana	abd-A	antp	Baldwin-Brown et al., 2018 (GCA_002872375.1)

## Sheet: Table S5
Supplementary Table S5 - The complete set of Hox cluster associated miRNAs found in this work. For every occurrence, genome cooridantes are given.
Species	miR-993	miR-10	miR-iab-4	miR-iab-8
Artemia franciscana	-	-	scaffold56/224719-224793	scaffold56/224719-224793
Daphnia magna	-	NC_046178.1/8231910-8232002	NC_046178.1/8042697-8042777	NC_046178.1/8042694-8042783
Daphnia pulex	GL732529.1/282300-282400	GL732529.1/304805-304897	GL732529.1/515537-515617	GL732529.1/515531-515622
Eulimnadia texana	-	C0007/150719-150808	C0002/3971673-3971746	C0002/3971665-3971752
Leptesteria dahalacensis	-	-	scaffold257/52607-52680	scaffold257/52599-52680
Lepidurus apus lubbockii	1687851/3231-3307	1689414/5910-6001	1688819/1362-1441	1688819/1362-1440
Lepidurus apus apus	scaffold32/295867-295943	scaffold32/276973-277064	scaffold32/131066-131145	scaffold32/131067-131145
Lepidurus arcticus	scaffold16/15771-15847	scaffold16/33621-33712	scaffold16/178339-178418	scaffold16/178339-178417
Lepidurus couesii	scaffold88/71788-71864	scaffold88/53784-53785	scaffold6/105250-105329	scaffold6/105250-105328
Triops longicaudatus	scaffold16/620125-620201	scaffold16/592378-592469	scaffold16/404479-404558	scaffold16/404480-404558
Triops cancriformis IT	scaffold21/110163-110239	scaffold21/81693-81784	scaffold3/43154-43233	scaffold3/43154-43232
Triops cancriformis ES	scaffold1/320759-320835	scaffold1/292337-292428	scaffold1/103067-103146	scaffold1/103068-103146

## Sheet: Table S6
Supplementary Table S6 - Summary statistics of RTT as performed by RRTree. Genetic distances (K) at nucleotide and amino acid level were computed using the Kimura 2-parameter and an adaptation of the Jukes-Cantor models, respectively. Pairwise comparisons with P<0.05 are highlighted in bolds and with an asterisk in the geneID.
GeneID	Sequence type	Outgroup	No. of sequences in outgroup	Lineage1	No. of sequences in lineage1	Lineage2	No. of sequences in lineage2	No. of compared sites	Mean K of lineage1 (K1)	Mean K of lineage2 (K2)	K1-K2 (dK)	Standard deviation of dK (sd)	sd/dK	Exact probability (P)
abdA	Amino acid	F. candida	1	Notostraca	7	Anostraca	1	122	0.298926	0.402146	-0.10322	0.0548487	-18.819	0.0598584
abdA	Amino acid	F. candida	1	Onychocaudata	4	Notostraca	7	122	0.365396	0.298926	0.0664697	0.0420007	158.259	0.113523
abdA	Amino acid	F. candida	1	Onychocaudata	4	Anostraca	1	122	0.365396	0.402146	-0.03675	0.051353	-0.715635	0.47422
abdB	Amino acid	F. candida	1	Notostraca	7	Anostraca	1	95	0.203893	0.251617	-0.0477248	0.047958	-0.995137	0.319674
abdB	Amino acid	F. candida	1	Onychocaudata	4	Anostraca	1	95	0.220336	0.251617	-0.0312817	0.04624	-0.676508	0.498723
abdB	Amino acid	F. candida	1	Onychocaudata	4	Notostraca	7	95	0.220336	0.203893	0.0164431	0.0345846	0.475444	0.634474
antp	Amino acid	F. candida	1	Onychocaudata	3	Notostraca	7	73	0.15869	0.157153	0.00153744	0.0206059	0.0746116	0.940524
antp	Amino acid	F. candida	1	Onychocaudata	3	Anostraca	1	73	0.15869	0.101082	0.0576081	0.0381303	1.51082	0.130843
antp	Amino acid	F. candida	1	Notostraca	7	Anostraca	1	73	0.157153	0.101082	0.0560706	0.037749	1.48536	0.137458
cad	Amino acid	F. candida	1	Onychocaudata	4	Anostraca	1	90	0.320792	0.376895	-0.0561026	0.0557013	-10.072	0.313844
cad	Amino acid	F. candida	1	Notostraca	7	Anostraca	1	90	0.330841	0.376895	-0.0460535	0.0626585	-0.734993	0.462347
cad	Amino acid	F. candida	1	Onychocaudata	4	Notostraca	7	90	0.320792	0.330841	-0.010049	0.0382547	-0.262687	0.792793
dfd	Amino acid	F. candida	1	Onychocaudata	5	Notostraca	8	103	0.342311	0.356751	-0.01444	0.0355024	-0.406734	0.684207
dfd	Amino acid	F. candida	1	Notostraca	8	Anostraca	1	103	0.356751	0.347829	0.00892157	0.0443647	0.201096	0.840625
dfd	Amino acid	F. candida	1	Onychocaudata	5	Anostraca	1	103	0.342311	0.347829	-0.00551844	0.0438157	-0.125947	0.899775
ftz	Amino acid	F. candida	1	Onychocaudata	5	Notostraca	7	80	0.474577	0.442508	0.0320681	0.0608887	0.526668	0.598428
ftz	Amino acid	F. candida	1	Onychocaudata	5	Anostraca	1	80	0.474577	0.497867	-0.0232908	0.0746657	-0.311934	0.755093
ftz	Amino acid	F. candida	1	Notostraca	7	Anostraca	1	80	0.442508	0.497867	-0.0553589	0.084888	-0.652141	0.514316
hox3	Amino acid	F. candida	1	Notostraca	7	Anostraca	1	132	0.676237	0.865942	-0.189704	0.114488	-165.699	0.097531
hox3	Amino acid	F. candida	1	Onychocaudata	3	Notostraca	7	132	0.623613	0.676237	-0.0526246	0.073876	-0.712337	0.47626
hox3*	Amino acid	F. candida	1	Onychocaudata	3	Anostraca	1	132	0.623613	0.865942	-0.242329	0.107014	-226.445	0.0235542
lab*	Amino acid	F. candida	1	Notostraca	7	Anostraca	1	77	0.146148	0.569895	-0.423747	0.0954192	-44.409	1.01e-05
lab*	Amino acid	F. candida	1	Onychocaudata	6	Anostraca	1	77	0.244717	0.569895	-0.325178	0.0935152	-347.728	0.000510098
lab*	Amino acid	F. candida	1	Onychocaudata	6	Notostraca	7	77	0.244717	0.146148	0.0985688	0.0318267	309.705	0.00195979
pb	Amino acid	F. candida	1	Notostraca	7	Anostraca	1	156	0.711991	0.871759	-0.159768	0.0995018	-160.568	0.108352
pb	Amino acid	F. candida	1	Onychocaudata	4	Anostraca	1	156	0.755175	0.871759	-0.116584	0.0935657	-124.601	0.212768
pb	Amino acid	F. candida	1	Onychocaudata	4	Notostraca	7	156	0.755175	0.711991	0.0431839	0.0703802	0.61358	0.539497
scr	Amino acid	F. candida	1	Notostraca	7	Anostraca	1	138	0.334793	0.399428	-0.0646352	0.0465243	-138.928	0.164755
scr	Amino acid	F. candida	1	Onychocaudata	4	Anostraca	1	138	0.356645	0.399428	-0.0427837	0.0450184	-0.950359	0.341936
scr	Amino acid	F. candida	1	Onychocaudata	4	Notostraca	7	138	0.356645	0.334793	0.0218515	0.0368967	0.592235	0.553697
ubx	Amino acid	F. candida	1	Notostraca	7	Anostraca	1	88	0.135907	0.187863	-0.0519564	0.0424328	-122.444	0.220794
ubx	Amino acid	F. candida	1	Onychocaudata	3	Anostraca	1	88	0.142809	0.187863	-0.0450545	0.0421089	-106.995	0.284648
ubx	Amino acid	F. candida	1	Onychocaudata	3	Notostraca	7	88	0.142809	0.135907	0.0069019	0.0292359	0.236077	0.813375
abdA	Nucleotide	F. candida	1	Onychocaudata	4	Anostraca	1	366	0.6095	0.631085	-0.0215855	0.0597673	-0.361159	0.717983
abdA	Nucleotide	F. candida	1	Notostraca	7	Anostraca	1	366	0.518824	0.631085	-0.112261	0.0598021	-187.721	0.0604982
abdA*	Nucleotide	F. candida	1	Onychocaudata	4	Notostraca	7	366	0.6095	0.518824	0.0906754	0.0441578	205.344	0.0400382
abdB	Nucleotide	F. candida	1	Onychocaudata	4	Notostraca	7	285	0.412192	0.380742	0.0314503	0.0363855	0.864362	0.387396
abdB	Nucleotide	F. candida	1	Onychocaudata	4	Anostraca	1	285	0.412192	0.446683	-0.034491	0.0504956	-0.683049	0.49458
abdB	Nucleotide	F. candida	1	Notostraca	7	Anostraca	1	285	0.380742	0.446683	-0.0659413	0.0511863	-128.826	0.197664
antp	Nucleotide	F. candida	1	Onychocaudata	3	Notostraca	7	219	0.305984	0.306461	-0.000476998	0.0356496	-0.0133802	0.989325
antp	Nucleotide	F. candida	1	Onychocaudata	3	Anostraca	1	219	0.305984	0.397071	-0.0910874	0.0522881	-1.74203	0.0815122
antp	Nucleotide	F. candida	1	Notostraca	7	Anostraca	1	219	0.306461	0.397071	-0.0906104	0.0497889	-1.81989	0.068784
cad	Nucleotide	F. candida	1	Onychocaudata	4	Notostraca	7	270	0.468948	0.483913	-0.0149655	0.0383545	-0.390188	0.6964
cad	Nucleotide	F. candida	1	Onychocaudata	4	Anostraca	1	270	0.468948	0.56306	-0.0941125	0.0591202	-159.188	0.111419
cad	Nucleotide	F. candida	1	Notostraca	7	Anostraca	1	270	0.483913	0.56306	-0.079147	0.0648698	-122.009	0.222438
dfd	Nucleotide	F. candida	1	Onychocaudata	6	Notostraca	7	309	0.552837	0.567958	-0.0151213	0.0429187	-0.352324	0.724598
dfd	Nucleotide	F. candida	1	Onychocaudata	6	Anostraca	1	309	0.552837	0.597749	-0.0449122	0.0535545	-0.838626	0.401684
dfd	Nucleotide	F. candida	1	Notostraca	7	Anostraca	1	309	0.567958	0.597749	-0.0297909	0.059779	-0.49835	0.618241
ftz	Nucleotide	F. candida	1	Onychocaudata	5	Notostraca	7	216	0.516302	0.537636	-0.0213342	0.0495027	-0.43097	0.666493
ftz	Nucleotide	F. candida	1	Onychocaudata	5	Anostraca	1	216	0.516302	0.522893	-0.00659148	0.0651475	-0.101178	0.91941
ftz	Nucleotide	F. candida	1	Notostraca	7	Anostraca	1	216	0.537636	0.522893	0.0147427	0.0734046	0.200841	0.840824
hox3	Nucleotide	F. candida	1	Onychocaudata	3	Notostraca	7	396	0.769389	0.678376	0.0910129	0.0568698	160.037	0.109525
hox3*	Nucleotide	F. candida	1	Onychocaudata	3	Anostraca	1	396	0.769389	0.993713	-0.224324	0.0971994	-230.787	0.0210142
hox3*	Nucleotide	F. candida	1	Notostraca	7	Anostraca	1	396	0.678376	0.993713	-0.315337	0.0983339	-32.068	0.00134677
lab*	Nucleotide	F. candida	1	Onychocaudata	6	Notostraca	7	231	0.405115	0.341413	0.0637021	0.0323794	196.736	0.0491488
lab*	Nucleotide	F. candida	1	Onychocaudata	6	Anostraca	1	231	0.405115	0.721612	-0.316497	0.0856284	-369.617	0.000221664
lab*	Nucleotide	F. candida	1	Notostraca	7	Anostraca	1	231	0.341413	0.721612	-0.380199	0.0901314	-421.828	2.51e-05
pb	Nucleotide	F. candida	1	Onychocaudata	4	Notostraca	7	468	0.820699	0.835859	-0.0151605	0.0581781	-0.260587	0.794413
pb	Nucleotide	F. candida	1	Onychocaudata	4	Anostraca	1	468	0.820699	0.958238	-0.137539	0.0856632	-160.557	0.108377
pb	Nucleotide	F. candida	1	Notostraca	7	Anostraca	1	468	0.835859	0.958238	-0.122378	0.0887888	-137.831	0.168116
scr	Nucleotide	F. candida	1	Onychocaudata	4	Notostraca	7	417	0.518972	0.508839	0.0101327	0.0358751	0.282444	0.777605
scr	Nucleotide	F. candida	1	Onychocaudata	4	Anostraca	1	417	0.518972	0.565541	-0.0465689	0.0454343	-102.497	0.305383
scr	Nucleotide	F. candida	1	Notostraca	7	Anostraca	1	417	0.508839	0.565541	-0.0567016	0.0502856	-112.759	0.2595
ubx	Nucleotide	F. candida	1	Onychocaudata	3	Notostraca	7	264	0.274347	0.322281	-0.0479341	0.0327439	-146.391	0.143226
ubx	Nucleotide	F. candida	1	Notostraca	7	Anostraca	1	264	0.322281	0.402969	-0.0806881	0.0510659	-158.008	0.114098
ubx*	Nucleotide	F. candida	1	Onychocaudata	3	Anostraca	1	264	0.274347	0.402969	-0.128622	0.0501491	-25.648	0.0103305
abdA	Amino acid	F. candida	1	Daphnia	2	Notostraca	7	157	0.555091	0.48441	0.0706811	0.0620195	1.13966	0.254436
abdB	Amino acid	F. candida	1	Daphnia	2	Notostraca	7	130	0.327372	0.375629	-0.0482568	0.040027	-1.20561	0.227977
antp	Amino acid	F. candida	1	Daphnia	2	Notostraca	7	71	0.119938	0.119938	2.77556e-17	0.0151279	1.83473e-15	1
cad	Amino acid	F. candida	1	Daphnia	2	Notostraca	7	319	0.833478	0.876313	-0.0428348	0.0601584	-0.712034	0.476449
dfd	Amino acid	F. candida	1	Daphnia	2	Notostraca	7	144	0.500216	0.517224	-0.0170082	0.0539986	-0.314976	0.752782
ftz	Amino acid	F. candida	1	Daphnia	2	Notostraca	7	185	0.871176	0.991907	-0.120731	0.091109	-1.32513	0.185136
hox3	Amino acid	F. candida	1	Daphnia	2	Notostraca	7	348	1.09362	1.22087	-0.127256	0.0859108	-1.48126	0.138545
lab	Amino acid	F. candida	1	Daphnia	2	Notostraca	7	121	0.42552	0.350066	0.0754541	0.0388453	1.94243	0.0520941
pb	Amino acid	F. candida	1	Daphnia	2	Notostraca	7	203	0.89919	0.910308	-0.0111178	0.0853822	-0.130212	0.8964
scr	Amino acid	F. candida	1	Daphnia	2	Notostraca	7	162	0.439492	0.448772	-0.00927948	0.0503141	-0.184431	0.853676
ubx	Amino acid	F. candida	1	Daphnia	2	Notostraca	7	88	0.147201	0.135907	0.011294	0.0373639	0.302271	0.762448
abdA	Nucleotide	F. candida	1	Daphnia	2	Notostraca	7	471	0.731743	0.649538	0.0822056	0.0579759	1.41793	0.15622
abdB	Nucleotide	F. candida	1	Daphnia	2	Notostraca	7	390	0.477121	0.503808	-0.0266868	0.0403676	-0.661094	0.508557
antp	Nucleotide	F. candida	1	Daphnia	2	Notostraca	7	213	0.278465	0.269578	0.00888738	0.036917	0.24074	0.809758
cad	Nucleotide	F. candida	1	Daphnia	2	Notostraca	7	957	0.823258	0.869526	-0.0462685	0.0482726	-0.958484	0.337826
dfd	Nucleotide	F. candida	1	Daphnia	2	Notostraca	7	432	0.616314	0.674142	-0.0578274	0.0519325	-1.11351	0.265496
ftz	Nucleotide	F. candida	1	Daphnia	2	Notostraca	7	555	0.88081	0.956362	-0.0755518	0.0717911	-1.05239	0.29263
hox3	Nucleotide	F. candida	1	Daphnia	2	Notostraca	7	1044	1.18137	1.12107	0.0603021	0.0762054	0.79131	0.428769
lab	Nucleotide	F. candida	1	Daphnia	2	Notostraca	7	363	0.474816	0.511128	-0.0363118	0.0397646	-0.913169	0.36116
pb	Nucleotide	F. candida	1	Daphnia	2	Notostraca	7	609	0.933904	1.00215	-0.0682497	0.0729813	-0.935167	0.349709
scr	Nucleotide	F. candida	1	Daphnia	2	Notostraca	7	489	0.595503	0.59314	0.00236232	0.0469006	0.0503687	0.959829
ubx	Nucleotide	F. candida	1	Daphnia	2	Notostraca	7	264	0.27772	0.322281	-0.0445606	0.0368695	-1.2086	0.226823
abdA	Amino acid	F. candida	1	Spinicaudata	2	Notostraca	7	124	0.358161	0.29483	0.0633304	0.0461603	1.37197	0.170082
abdB	Amino acid	F. candida	1	Spinicaudata	2	Notostraca	7	95	0.267992	0.203893	0.0640994	0.0455445	1.4074	0.159316
antp*	Amino acid	F. candida	1	Spinicaudata	2	Notostraca	7	71	0.283323	0.119938	0.163384	0.0490446	3.33134	0.000868099
cad	Amino acid	F. candida	1	Spinicaudata	2	Notostraca	7	90	0.313005	0.330841	-0.0178361	0.0421347	-0.423311	0.672071
dfd	Amino acid	F. candida	1	Spinicaudata	4	Notostraca	7	103	0.33393	0.360011	-0.026081	0.0408408	-0.638602	0.523086
ftz	Amino acid	F. candida	1	Spinicaudata	2	Notostraca	7	77	0.448446	0.452516	-0.00407002	0.0675524	-0.0602498	0.951957
hox3	Amino acid	F. candida	1	Spinicaudata	1	Notostraca	7	133	0.655862	0.668853	-0.0129912	0.0854759	-0.151987	0.879199
lab*	Amino acid	F. candida	1	Spinicaudata	4	Notostraca	7	77	0.278048	0.146148	0.1319	0.0369124	3.57332	0.000354896
pb	Amino acid	F. candida	1	Spinicaudata	2	Notostraca	7	157	0.772811	0.71874	0.0540704	0.0798866	0.676839	0.498513
scr	Amino acid	F. candida	1	Spinicaudata	2	Notostraca	7	142	0.401909	0.364004	0.0379051	0.0417483	0.907942	0.363914
ubx	Amino acid	F. candida	1	Spinicaudata	1	Notostraca	7	88	0.134025	0.135907	-0.00188234	0.0271323	-0.0693762	0.944691
abdA*	Nucleotide	F. candida	1	Spinicaudata	2	Notostraca	7	414	0.710049	0.597841	0.112208	0.051567	2.17596	0.0295665
abdB	Nucleotide	F. candida	1	Spinicaudata	2	Notostraca	7	294	0.450658	0.393674	0.056984	0.0423547	1.3454	0.178506
antp*	Nucleotide	F. candida	1	Spinicaudata	2	Notostraca	7	213	0.42431	0.269578	0.154733	0.0479344	3.22801	0.00125124
cad	Nucleotide	F. candida	1	Spinicaudata	2	Notostraca	7	276	0.488405	0.482423	0.00598227	0.0421659	0.141874	0.88718
dfd	Nucleotide	F. candida	1	Spinicaudata	4	Notostraca	7	345	0.60599	0.595458	0.0105326	0.0456825	0.230561	0.817657
ftz	Nucleotide	F. candida	1	Spinicaudata	2	Notostraca	7	231	0.602548	0.56387	0.0386773	0.0601454	0.643062	0.520189
hox3	Nucleotide	F. candida	1	Spinicaudata	1	Notostraca	7	960	1.10977	1.05529	0.0544814	0.07352	0.741042	0.458674
lab*	Nucleotide	F. candida	1	Spinicaudata	4	Notostraca	7	231	0.444088	0.341413	0.102675	0.0359829	2.85343	0.00433082
pb	Nucleotide	F. candida	1	Spinicaudata	2	Notostraca	7	582	0.906198	0.967344	-0.0611463	0.0727758	-0.840201	0.400802
scr	Nucleotide	F. candida	1	Spinicaudata	2	Notostraca	7	438	0.553972	0.520338	0.0336335	0.0380402	0.884158	0.376617
ubx	Nucleotide	F. candida	1	Spinicaudata	1	Notostraca	7	264	0.2676	0.322281	-0.054681	0.0378351	-1.44524	0.148396

## Sheet: Table S7
Supplementary Table S7 - aBSREL results. The test was performed on terminal branches of each HPHG tree.
Tested branch	No. of inferred ω rate classes	Max. dN/dS (proportion of sites)	LRT	Bonferroni corrected p-value
Ldah_g3248.t1_abdA	2	> 1000 (6,63%)	3.8	0.7164
Etex_C0002.g612.t1_abdA	2	13,27 (6,17%)	3.64	0.72
Fcan_XP.035706584.1_abdA	2	> 1000 (25,65%)	0.08	1
Afr1_01483_abdA	2	6,98 (15,16%)	-0.02	1
Dmag_XP.032785543.1_abdA	1	0,00 (100,00%)	0	1
Lubb_g2378.t1_abdA	1	0,14 (100,00%)	0	1
Tlon_g1065.t1_abdA	1	0,09 (100,00%)	0	1
Lcou_01_abdA	1	0,00 (100,00%)	0	1
Lart_01_abdA	1	0,00 (100,00%)	0	1
Lapu_g207.t1_abdA	1	0,59 (100,00%)	0	1
Dpul_EFX86800.1_abdA	1	0,06 (100,00%)	0	1
Tces_g723.t1_abdA	1	0,00 (100,00%)	0	1
Tcit.g509.t1_abdA	1	1,00 (100,00%)	0	1
Ldah_g1520.t1_abdB*	2	> 1000 (12,67%)	10.0501	0.0023
Lubb_g11468.t1_abdB	1	0,04 (100,00%)	0	0.0914
Afr1_17013_abdB	2	95,96 (14,96%)	0.4471	0.3407
Fcan_XP.035707030.1_abdB	2	1,89 (13,08%)	0.0003	0.4971
Ldah_g13731.t1_abdB	2	47,94 (6,90%)	2.8303	1
Dmag_XP.032785540.1_abdB	1	0,00 (100,00%)	0	1
Tlon_g1062.t1_abdB	1	0,26 (100,00%)	0	1
Lapu_g203.t1_abdB	1	0,00 (100,00%)	0	1
Lart_02_abdB	1	0,00 (100,00%)	0	1
Tcit_02_abdB	1	0,00 (100,00%)	0	1
Lcou_02_abdB	1	1,00 (100,00%)	0	1
Dpul_EFX86798.1_abdB	1	1,00 (100,00%)	0	1
Tces_02_abdB	1	1,00 (100,00%)	0	1
Etex_C0002.g604.t2_antp	1	0.00 (100,00%)	0	1
Fcan_XP.021952588.1_antp	2	175,28 (9,12%)	0.42	0.34766
Afr1_13755_antp	2	1,66 (2,91%)	0.06	0.45425
Dpul_EFX86804.1_antp	1	0,00 (100,00%)	0	1
Lapu_g209.t1_antp	1	0,00 (100,00%)	0	1
Tlon_g1068.t1_antp	1	0,00 (100,00%)	0	1
Tusa_g801.t1_antp	1	0,00 (100,00%)	0	1
Lubb_g2738.t1_antp	1	0,00 (100,00%)	0	1
Lcou_04_antp	1	0,00 (100,00%)	0	1
Tita_g727.t1_antp	1	0,00 (100,00%)	0	1
Dmag_XP.032785563.1_antp	1	1,00 (100,00%)	0	1
Lart_03_antp	1	1,00 (100,00%)	0	1
Tlon_04_cad	2	> 1000 (1,30%)	3.9371	0.6675
Fcan_XP.035705838.1_cad	2	0,22 (22,40%)	0	1
Afr1_07949_cad	1	0,01 (100,00%)	0	1
Etex_C0008.g151.t2_cad	1	0,00 (100,00%)	0	1
Dmag_XP.032786554.1_cad	1	0,00 (100,00%)	0	1
Ldah_g16475.t1_cad	2	1,50 (11,48%)	-0.2192	1
Lubb_g5810.t1_cad	1	0,00 (100,00%)	0	1
Lart_g6847.t1_cad	1	0,00 (100,00%)	0	1
Lapu_g7498.t1_cad	1	0,00 (100,00%)	0	1
Tcit.g3522.t1_cad	1	0,00 (100,00%)	0	1
Dpul_EFX86750.1_cad	1	1,00 (100,00%)	0	1
Lcou_g3926.t1_cad	1	1,00 (100,00%)	0	1
Tces_04_cad	1	1,00 (100,00%)	0	1
Etex_C0002.g599.t1_dfd	2	17,98 (7,95%)	8.8781	0.0618
Ldah_g6648.t1_dfd	2	> 1000 (11,43%)	8.1844	0.082
Afr1_17275_dfd	2	1,66 (12,15%)	-0.0124	1
Fcan_XP.021951082.1_dfd	2	151,22 (30,91%)	0.0419	1
Dmag_XP.032785565.1_dfd	1	0,01 (100,00%)	0	1
Tlon_g1071.t1_dfd	1	0,39 (100,00%)	0	1
Lart_06_dfd	1	0,20 (100,00%)	0	1
Tces_g730.t1_dfd	1	0,00 (100,00%)	0	1
Lubb_g13200.t1_dfd	1	0,00 (100,00%)	0	1
Lcou_06_dfd	1	0,00 (100,00%)	0	1
Tcit.g806.t1_dfd	1	0,00 (100,00%)	0	1
Lapu_g212.t1_dfd	1	0,00 (100,00%)	0	1
Dpul_EFX86808.1_dfd	1	> 1000 (100,00%)	0.0305	1
Etex_C0007.g27.t1_dfd	1	1,00 (100,00%)	0	1
Ldah_g14037.t1_ftz	2	> 1000 (12,00%)	5.61	0.02172
Dpul_EFX86805.1_ftz	2	50,61 (3,44%)	2.27	0.12296
Etex_C0007.g24.t1_ftz	2	4,00 (17,20%)	1.95	0.14549
Lubb_g3887.t1.t1_ftz	1	> 1000 (100,00%)	0.18	0.40956
Fcan_XP.021951322_2_ftz	2	> 1000 (8,11%)	-0.01	0.5
Afr1_17267_ftz	2	0,34 (19,38%)	0	1
Dmag_XP.032785568_1_ftz	1	0,00 (100,00%)	0	1
Ldah_g1519.t1_ftz	1	0,25 (100,00%)	0	1
Tlon_g1069.t1_ftz	1	0,00 (100,00%)	0	1
Lapu_g210.t1_ftz	1	0,00 (100,00%)	0	1
Lcou_08_ftz	1	0,00 (100,00%)	0	1
Lart_08_ftz	1	0,00 (100,00%)	0	1
Tita_g728.t1_ftz	1	0,00 (100,00%)	0	1
Tusa_g802.t1_ftz	1	1,00 (100,00%)	0	1
Dpul_EFX86809.1_hox3	2	> 1000 (2,66%)	7.678	0.0909
Fcan_XP.021951314.1_hox3	2	5,94 (24,36%)	3.8149	0.6017
Tlon_g1073.t1_hox3	2	4,84 (8,15%)	3.1803	0.7607
Etex_C0007.g29.t1_hox3	2	1,47 (12,42%)	-0.0721	1
Afr1_17274_hox3	2	24,51 (38,97%)	1.3062	1
Dmag_XP.032785561.1_hox3	1	0,04 (100,00%)	0	1
Lubb_g3235.t1_hox3	1	0,13 (100,00%)	0	1
Lart_09_hox3	1	0,25 (100,00%)	0	1
Tcit.g808.t1_hox3	1	0,12 (100,00%)	0	1
Lapu_g213.t1_hox3	1	0,44 (100,00%)	0	1
Lcou_09_hox3	1	0,92 (100,00%)	0	1
Tces_g731.t1_hox3	1	0,00 (100,00%)	0	1
Ldah_g6310.t1_lab	2	67,24 (17,01%)	4.0713	0.7185
Etex_C0002.g597.t1_lab	2	5,21 (19,52%)	-0.0044	1
Afr1_08854_lab	2	34,56 (36,03%)	1.5443	1
Etex_C0007.g32.t1_lab	1	0,01 (100,00%)	0	1
Dmag_XP.032785564.1_lab	1	0,01 (100,00%)	0	1
Tlon_g2620.t1_lab	1	0,00 (100,00%)	0	1
Lapu_g3174.t1_lab	1	0,06 (100,00%)	0	1
Fcan_XP.021952045.1_lab	1	> 1000 (100,00%)	0.0285	1
Dpul_EFX86813.1_lab	1	0,00 (100,00%)	0	1
Lart_10_lab	1	0,00 (100,00%)	0	1
Ldah_g14672.t1_lab	1	0,00 (100,00%)	0	1
Lubb_g12364.t1_lab	1	1,00 (100,00%)	0	1
Lcou_10_lab	1	1,00 (100,00%)	0	1
Tces_g5763.t1_lab	1	1,00 (100,00%)	0	1
Tcit.g7702.t1_lab	1	1,00 (100,00%)	0	1
Afr1_08853_pb	2	> 1000 (48,30%)	-25.9745	1
Fcan_XP.035706958.1_pb	2	1,63 (34,27%)	-25.4568	1
Ldah_g11575.t1_pb	2	508,33 (9,15%)	-19.6606	1
Dpul_EFX86812.1_pb	1	> 1000 (100,00%)	-34.2439	1
Tlon_g2619.t1_pb	1	0,02 (100,00%)	0	1
Etex_C0007.g31.t1_pb	1	3,26 (100,00%)	-34.1734	1
Lubb_g8547.t1_pb	1	0,06 (100,00%)	0	1
Dmag_XP.032785562.1_pb	2	0,94 (7,66%)	0	1
Lapu_g3175.t1_pb	1	0,23 (100,00%)	0	1
Lart_11_pb	1	0,39 (100,00%)	0	1
Tces_10_pb	1	0,06 (100,00%)	0	1
Lcou_11_pb	1	0,09 (100,00%)	0	1
Tcit.g2708.t1_pb	1	1,00 (100,00%)	0	1
Tlon_12_scr*	2	35,52 (9,64%)	21.7823	0.0001
Ldah_g6649.t1_scr	2	92,04 (10,30%)	7.5882	0.0951
Etex_C0007.g25.t1_scr	2	341,82 (20,24%)	3.1992	0.8286
Fcan_XP.021951280.1_scr	2	> 1000 (17,11%)	0.0149	1
Afr1_17271_scr	2	> 1000 (11,37%)	-0.0574	1
Dmag_XP.032785567.1_scr	1	0,00 (100,00%)	0	1
Lubb_g3227.t1_scr	1	0,13 (100,00%)	0	1
Tcit.12_scr	1	0,21 (100,00%)	0	1
Lapu_g211.t1_scr	1	0,00 (100,00%)	0	1
Lart_12_scr	1	0,00 (100,00%)	0	1
Lcou_12_scr	1	0,00 (100,00%)	0	1
Dpul_EFX86806.1_scr	1	> 1000 (100,00%)	-0.0423	1
Tces_g729.t1_scr	1	1,00 (100,00%)	0	1
Afr1_13756_ubx	1	0,00 (100,00%)	0	1
Fcan_XP.021951054.1_ubx	1	0,05 (100,00%)	0	1
Ldah_g11919.t1_ubx	2	1,75 (7,38%)	0.2782	1
Lubb_g3060.t1_ubx	1	0,14 (100,00%)	0	1
Dmag_XP.032785569.1_ubx	1	> 1000 (100,00%)	0.0379	1
Tlon_g1067.t1_ubx	1	0,00 (100,00%)	0	1
Dpul_EFX86802.1_ubx	1	0,00 (100,00%)	0	1
Lart_13_ubx	1	0,00 (100,00%)	0	1
Tces_g726.t1_ubx	1	0,00 (100,00%)	0	1
Lcou_g101.t1_ubx	1	1,00 (100,00%)	0	1
Lapu_g208.t1_ubx	1	0,00 (100,00%)	0	1
Tcit.g3772.t1_ubx	1	1,00 (100,00%)	0	1

## Sheet: Table S8
Supplementary Table S8 - RELAX results. The relaxation/intensification parameter (K) measure whether selection among test branches relative to reference branches has relaxed (<1) or intensified (>1). Analyses have been performed between Cladocera and Notostraca clades.
geneID	Relaxation/ intensification parameter (K)	LRT	p-value
lab*	0.17	4.24	0.039
pb	0.93	0.58	0.448
Hox3	7	2.71	0.099
dfd*	0.57	4.25	0.039
scr*	13.92	6.67	0.01
ftz	0.17	0.93	0.334
antp	1.09	0	1
ubx	0.48	0.78	0.377
abdA	0.56	3.32	0.069
abdB*	0.39	5.89	0.015
cad*	8.96	7.67	0.006
